# Supplementary material for: Galangin Rescues Alzheimer’s Amyloid-β Induced Mitophagy and Brain Organoid Growth Impairment
Source: MDPI journal article supplement (doi:10.3390/ijms24043398), 2023-02-08
Supplement: s1 [file s1]

Article

# Alzheimer's Amyloid- $\beta$ impairs mitophagy and growth of brain organoids which could be rescued by dietary flavonoid galangin

Ru Zhang<sup>1</sup>, Juan Lu<sup>1</sup>, Gang Pei<sup>1,2,3</sup>, Shichao Huang<sup>1,\*</sup>

<sup>1</sup> State Key Laboratory of Cell Biology, Shanghai Institute of Biochemistry and Cell Biology, Center for Excellence in Molecular Cell Science, Chinese Academy of Sciences, Shanghai 200031, China

<sup>2</sup> Shanghai Key Laboratory of Signaling and Disease Research, Laboratory of Receptor-Based Biomedicine, The Collaborative Innovation Center for Brain Science, School of Life Sciences and Technology, Tongji University, Shanghai 200070, China

<sup>3</sup> Institute for Stem Cell and Regeneration, Chinese Academy of Sciences, Beijing 100045, China

\* Correspondence: huangshichao@sibcb.ac.cn (S.H.)

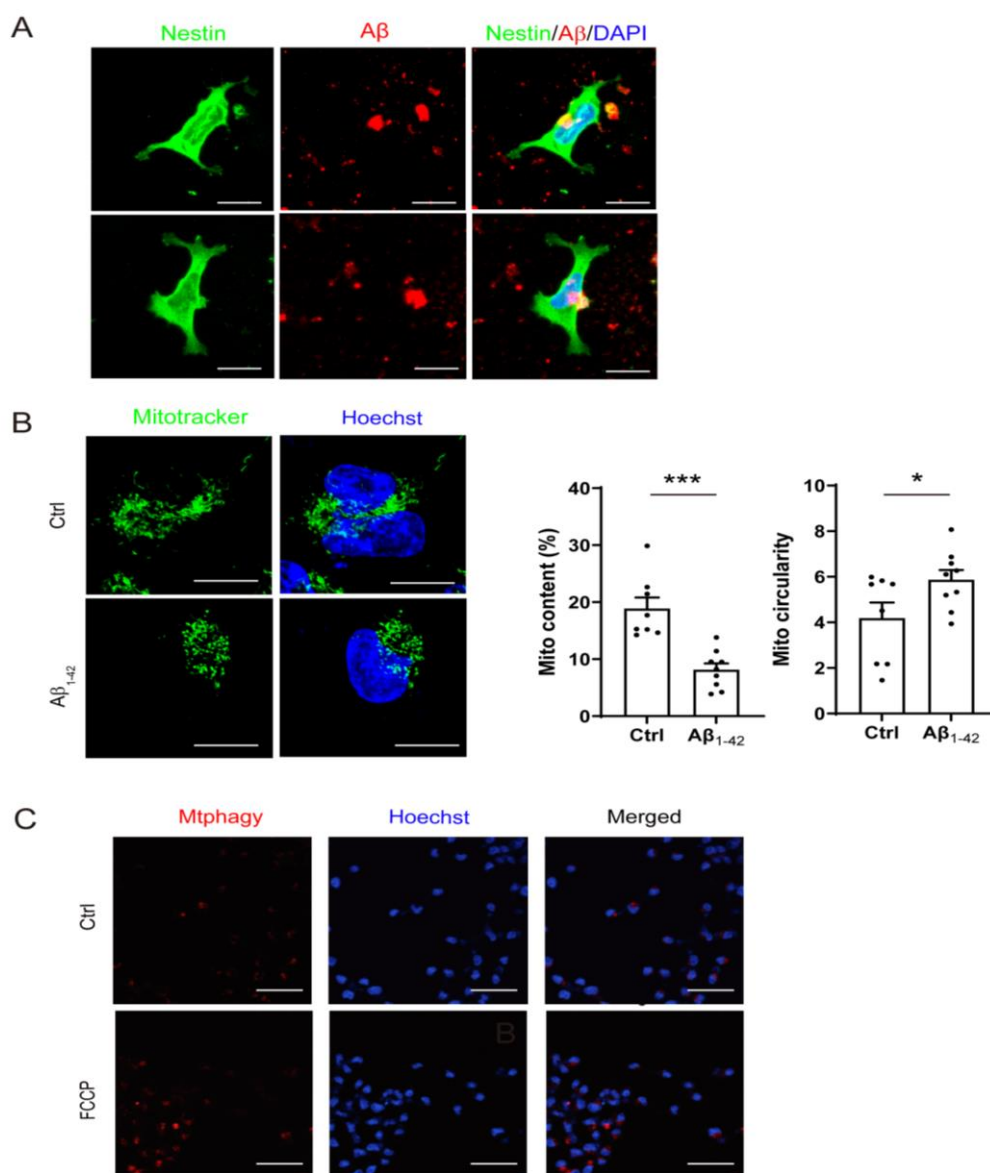

Figure S1. (A) Immunofluorescence staining of A $\beta$  and Nestin on A $\beta$ -treated NPCs. Scale bar, 20  $\mu$ m. (B) Images and quantifications of MitoTracker staining on A $\beta$ -treated NPCs. Scale bar, 10  $\mu$ m. (C) Mitophagy staining of mitophagy induction (FCCP). Scale bar, 50  $\mu$ m. \*  $p < 0.05$ , \*\*\*  $p < 0.001$
